# Supplementary material for: The C-Terminal Domain of Liquorilactobacillus nagelii Dextransucrase Mediates the Production of Larger Dextrans Compared to Liquorilactobacillus hordei
Source: MDPI journal article supplement (doi:10.3390/gels8030171), 2022-03-09
Supplement: s1 [file s1]

# The C-terminal Domain of *Liquorilactobacillus nagelii* Dextranucrase Mediates the Production of Larger Dextrans Compared to *Liquorilactobacillus hordei*

Julia Bechtner<sup>1\*</sup>, Verena Hassler<sup>2</sup>, Daniel Wefers<sup>2</sup>, Matthias Ehrmann<sup>1\*</sup> and Frank Jakob<sup>3</sup>

**Table S1.** Table of *p*-values representing statistical significance regarding isolated and predicted amounts of dextran and respective average molecular weights ( $M_w$ ) and average rms radii as obtained from comparison of dextrans produced by distinct amounts of enzyme extracts of the heterologously expressed dextranucrase variants dsr3510 and dsr3510ΔC-term. Light gray =  $0.05 > p > 0.01$ ; gray =  $0.01 \geq p > 0.001$ ; dark gray =  $p \leq 0.001$ .

| Dextran isolated   | dsr3510ΔC-term 1X | dsr3510ΔC-term 2X | dsr3510ΔC-term 4X | dsr3510ΔC-term 10X | dsr3510 1X | dsr3510 2X | dsr3510 4X | dsr3510 10X |
|--------------------|-------------------|-------------------|-------------------|--------------------|------------|------------|------------|-------------|
| dsr3510ΔC-term 1X  | -                 | 0.039             | 0.003             | <0.001             | <0.001     | <0.001     | <0.001     | <0.001      |
| dsr3510ΔC-term 2X  | 0.039             | -                 | 0.038             | 0.001              | 0.254      | 0.527      | 0.529      | 0.033       |
| dsr3510ΔC-term 4X  | 0.003             | 0.038             | -                 | 0.011              | 0.008      | 0.012      | 0.012      | 0.528       |
| dsr3510ΔC-term 10X | <0.001            | 0.001             | 0.011             | -                  | <0.001     | <0.001     | <0.001     | 0.002       |
| dsr3510 1X         | <0.001            | 0.254             | 0.008             | <0.001             | -          | 0.048      | 0.066      | 0.002       |
| dsr3510 2X         | <0.001            | 0.527             | 0.012             | <0.001             | 0.048      | -          | 1.000      | 0.004       |
| dsr3510 4X         | 0.001             | 0.529             | 0.012             | <0.001             | 0.066      | 1.000      | -          | 0.004       |
| dsr3510 10X        | 0.001             | 0.033             | 0.528             | 0.002              | 0.002      | 0.004      | 0.004      | -           |
| Dextran predicted  | dsr3510ΔC-term 1X | dsr3510ΔC-term 2X | dsr3510ΔC-term 4X | dsr3510ΔC-term 10X | dsr3510 1X | dsr3510 2X | dsr3510 4X | dsr3510 10X |
| dsr3510ΔC-term 1X  | -                 | 0.142             | 0.001             | <0.001             | 0.644      | 0.880      | 0.510      | 0.005       |
| dsr3510ΔC-term 2X  | 0.142             | -                 | 0.046             | 0.003              | 0.108      | 0.149      | 0.101      | 0.126       |
| dsr3510ΔC-term 4X  | 0.001             | 0.046             | -                 | 0.007              | 0.001      | 0.001      | 0.001      | 0.361       |
| dsr3510ΔC-term 10X | <0.001            | 0.003             | 0.007             | -                  | <0.001     | <0.001     | <0.001     | 0.005       |
| dsr3510 1X         | 0.644             | 0.108             | 0.001             | <0.001             | -          | 0.457      | 0.640      | 0.004       |
| dsr3510 2X         | 0.880             | 0.149             | 0.001             | <0.001             | 0.457      | -          | 0.397      | 0.005       |
| dsr3510 4X         | 0.510             | 0.101             | 0.001             | <0.001             | 0.640      | 0.397      | -          | 0.004       |
| dsr3510 10X        | 0.005             | 0.126             | 0.361             | 0.005              | 0.004      | 0.005      | 0.004      | -           |
| RMS radii          | dsr3510ΔC-term 1X | dsr3510ΔC-term 2X | dsr3510ΔC-term 4X | dsr3510ΔC-term 10X | dsr3510 1X | dsr3510 2X | dsr3510 4X | dsr3510 10X |
| dsr3510ΔC-term 1X  | -                 | 0.136             | 0.051             | 0.003              | <0.001     | <0.001     | <0.001     | <0.001      |
| dsr3510ΔC-term 2X  | 0.136             | -                 | 0.616             | 0.106              | 0.002      | <0.001     | <0.001     | 0.001       |
| dsr3510ΔC-term 4X  | 0.051             | 0.616             | -                 | 0.173              | 0.001      | <0.001     | <0.001     | 0.001       |

|                           |                          |                          |                          |                           |                   |                   |                   |                    |
|---------------------------|--------------------------|--------------------------|--------------------------|---------------------------|-------------------|-------------------|-------------------|--------------------|
| <b>dsr3510ΔC-term 10X</b> | 0.003                    | 0.106                    | 0.173                    | -                         | <0.001            | <0.001            | <0.001            | 0.001              |
| <b>dsr3510 1X</b>         | <0.001                   | 0.002                    | 0.001                    | <0.001                    | -                 | 0.002             | 0.001             | 0.010              |
| <b>dsr3510 2X</b>         | <0.001                   | <0.001                   | <0.001                   | <0.001                    | 0.002             | -                 | 0.069             | 0.122              |
| <b>dsr3510 4X</b>         | <0.001                   | <0.001                   | <0.001                   | <0.001                    | 0.001             | 0.069             | -                 | 0.304              |
| <b>dsr3510 10X</b>        | <0.001                   | 0.001                    | 0.001                    | 0.001                     | 0.010             | 0.122             | 0.304             | -                  |
| <b>M<sub>w</sub></b>      | <b>dsr3510ΔC-term 1X</b> | <b>dsr3510ΔC-term 2X</b> | <b>dsr3510ΔC-term 4X</b> | <b>dsr3510ΔC-term 10X</b> | <b>dsr3510 1X</b> | <b>dsr3510 2X</b> | <b>dsr3510 4X</b> | <b>dsr3510 10X</b> |
| <b>dsr3510ΔC-term 1X</b>  | -                        | 0.234                    | 0.186                    | 0.002                     | 0.002             | <0.001            | <0.001            | 0.001              |
| <b>dsr3510ΔC-term 2X</b>  | 0.234                    | -                        | 0.007                    | <0.001                    | 0.001             | <0.001            | <0.001            | <0.001             |
| <b>dsr3510ΔC-term 4X</b>  | 0.186                    | 0.007                    | -                        | 0.001                     | 0.002             | <0.001            | <0.001            | 0.001              |
| <b>dsr3510ΔC-term 10X</b> | 0.002                    | <0.001                   | 0.001                    | -                         | 0.076             | 0.004             | 0.005             | 0.002              |
| <b>dsr3510 1X</b>         | 0.002                    | 0.001                    | 0.002                    | 0.076                     | -                 | 0.065             | 0.063             | 0.006              |
| <b>dsr3510 2X</b>         | <0.001                   | <0.001                   | <0.001                   | 0.004                     | 0.065             | -                 | 0.908             | 0.015              |
| <b>dsr3510 4X</b>         | <0.001                   | <0.001                   | <0.001                   | 0.005                     | 0.063             | 0.908             | -                 | 0.017              |
| <b>dsr3510 10X</b>        | 0.001                    | <0.001                   | 0.001                    | 0.002                     | 0.006             | 0.015             | 0.017             | -                  |

**Table S2.** Primers used for the cloning and sequencing of the two dextranucrase variants dsr3510 and dsr3510ΔC-term.

| <b>Primer</b>         | <b>Sequence (5'→3')</b>        | <b>Application</b>                                   |
|-----------------------|--------------------------------|------------------------------------------------------|
| Nag-forward           | GCCTCGAGAGATTCAACACCACAAAATG   | Primer for cloning of both variants                  |
| Nag-complete-reverse  | GCTTCGAAGCAAGTTTTCTACCGGTTTTAG | Primer for cloning of complete dextranucrase dsr3510 |
| Nag-truncated-reverse | GCTTCGAAGCATTATCGTCACTACGTAAAC | Primer for cloning of dsr3510ΔC-term dextranucrase   |
| Nag-1-Fwd             | CGGATCCTACCTGACGCTTT           | Sequencing of constructs                             |
| Nag-2-Fwd             | GGTGAGTACGAAAAAGTTGGCG         | Sequencing of constructs                             |
| Nag-3-Fwd             | AACTGGTTGCGTCAGATTATGC         | Sequencing of constructs                             |
| Nag-4-Fwd             | CAAAAGGCAATTCAAGCAGCCA         | Sequencing of constructs                             |
| Nag-5-Fwd             | GCTAACCCGGATGTAAGTGA           | Sequencing of complete dextranucrase construct       |
| Nag-6-Fwd             | CTTGGTCGCGGTAGCGATTA           | Sequencing of complete dextranucrase construct       |
| Nag-7-Fwd             | TGGCTGGCAGTATATTAGCG           | Sequencing of complete dextranucrase construct       |
| Nag-8-Fwd             | ATTGCTGATTGGGTGCCGGA           | Sequencing of truncated dextranucrase construct      |
| Nag-9-Fwd             | CTGATGACAATGCTCCGATTGC         | Sequencing of truncated dextranucrase construct      |
